# Supplementary material for: Gene expression differences between PAXgene and Tempus blood RNA tubes are highly reproducible between independent samples and biobanks
Source: PubMed Central journal article supplement (PMC5364635; doi:10.1186/s13104-017-2455-6), 2017-03-23
Supplement: 13104_2017_2455_MOESM2_ESM.pdf [file 13104_2017_2455_MOESM2_ESM.pdf]

**A**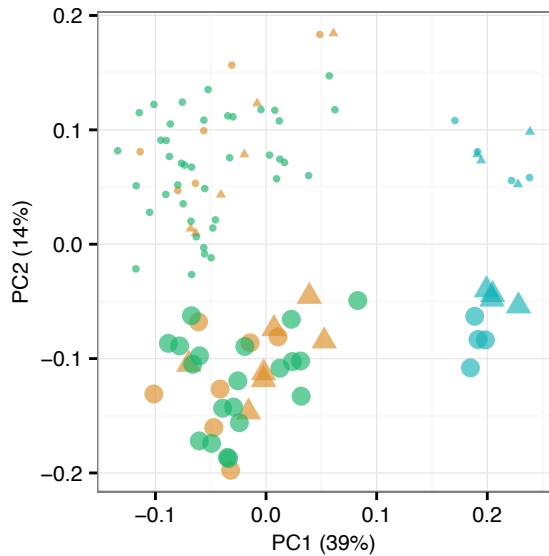

Experiment

- 1
- 2
- 3

Protocol

- Modified
- Original

Tube

- PAXgene
- Tempus

**B**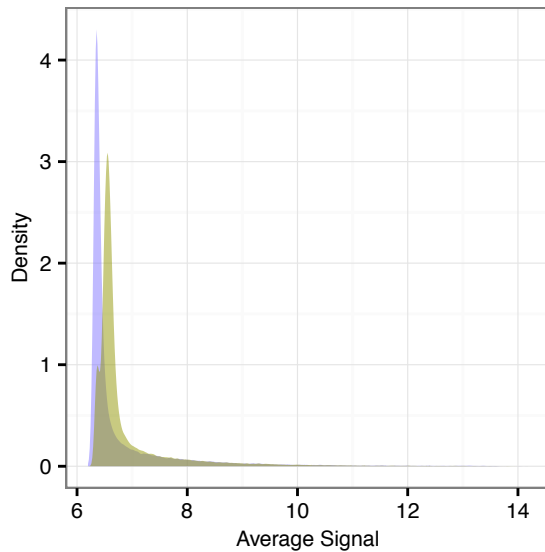

Run

- First
- Second
